# Supplementary material for: Fully phase-stabilized quantum cascade laser frequency comb
Source: PubMed Central journal article supplement (PMC6610094; doi:10.1038/s41467-019-10913-7), 2019-07-03
Supplement: 41467_2019_10913_MOESM1_ESM.pdf [file 41467_2019_10913_MOESM1_ESM.pdf]

Supplementary Information

**Fully phase-stabilized quantum  
cascade laser frequency comb**

*Consolino et al*

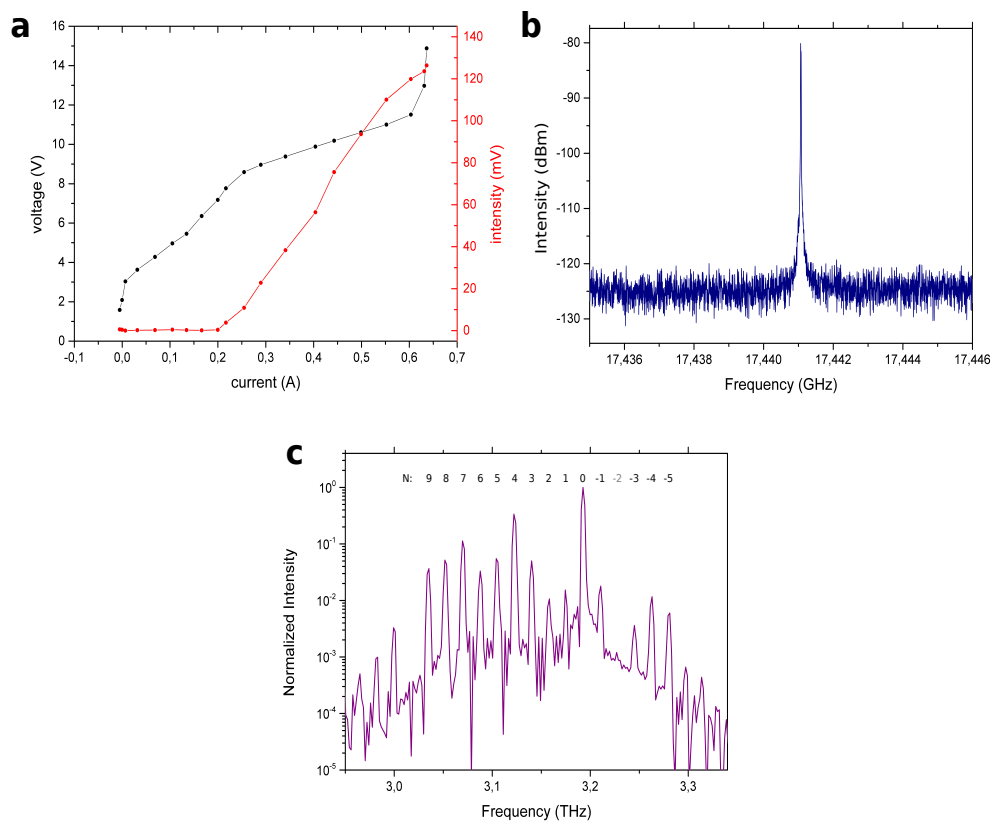

**Supplementary Figure 1** Electrical and optical characterization of the QCL-comb. **a** current-voltage characteristics of the THz QCL-comb. **b** intermode beat-note (IBN) signal electrically retrieved. The IBN is 20 kHz wide at 20 ms integration time. **c** Fourier transform infrared spectrum measured at a heat sink temperature of 25 K and with QCL operating in continuous wave with a current of 0.32 A. The spectrum is acquired in rapid scan mode, in air, with a resolution of  $0.125 \text{ cm}^{-1}$ . The order  $N$  of each mode is labeled on the graph.

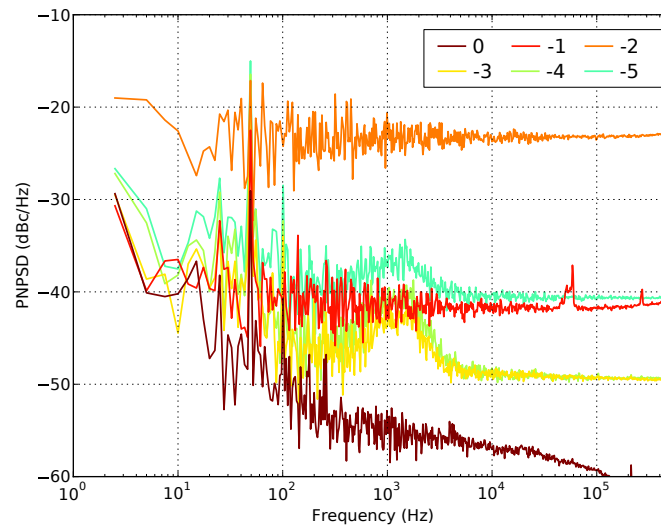

**Supplementary Figure 2** Phase Noise Power Spectral Density analysis. Simultaneous retrieval of the PNPSP of the beat-notes from the Fourier-transform spectra of the RF-comb in 2-second-long acquisitions (see fig. 3a), for modes from 0 to -5.
